# Supplementary material
Source: PubMed Central journal article supplement (PMC4040250)
Supplement: NIHMS574500-supplement-1.pdf [file NIHMS574500-supplement-1.pdf]

## Supplementary information

### **Protein Kinase C- $\eta$ Controls CTLA-4-Mediated Regulatory T Cell Function**

Kok-Fai Kong, Guo Fu<sup>2</sup>, Yaoyang Zhang, Tadashi Yokosuka, Javier Casas, Ann J. Canonigo-Balancio, Stephane Becart, Gisen Kim, John R. Yates III, Mitchell Kronenberg, Takashi Saito, Nicholas R. J. Gascoigne & Amnon Altman

**a**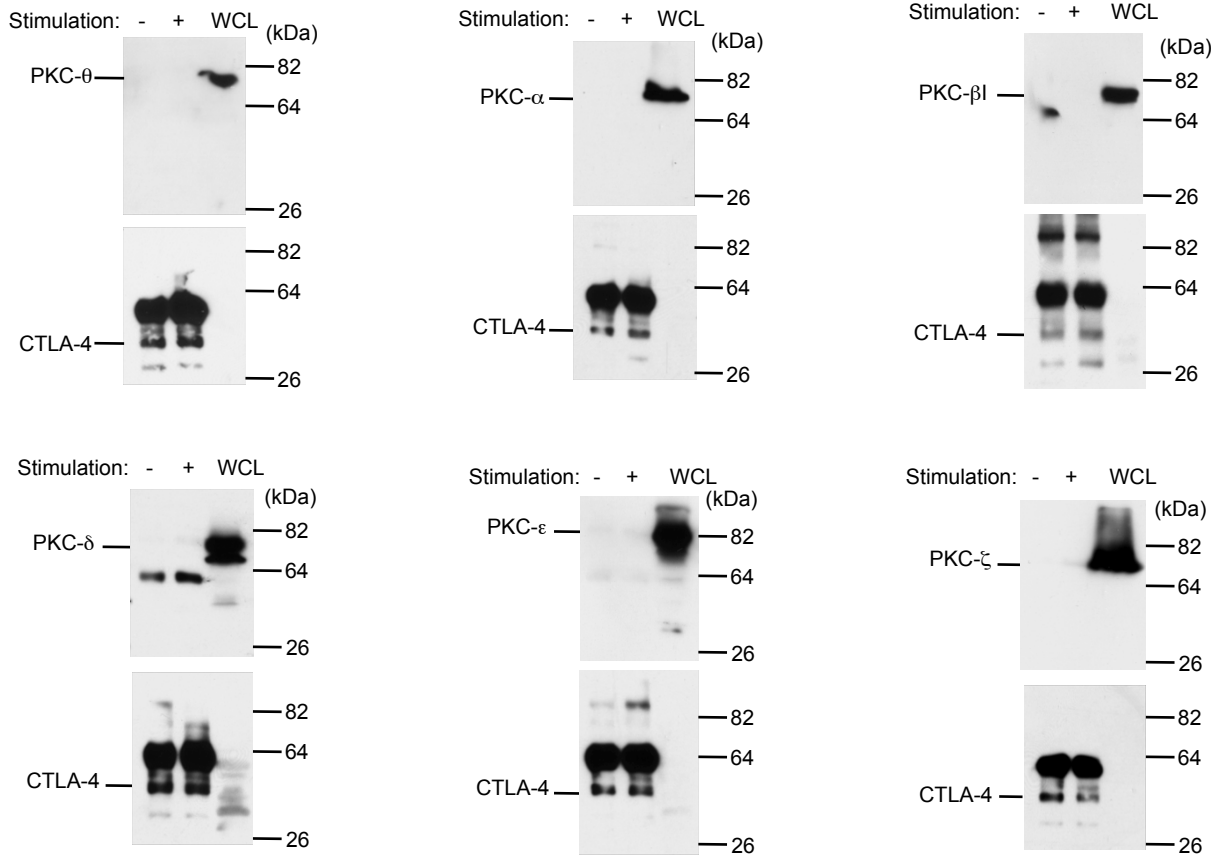**b**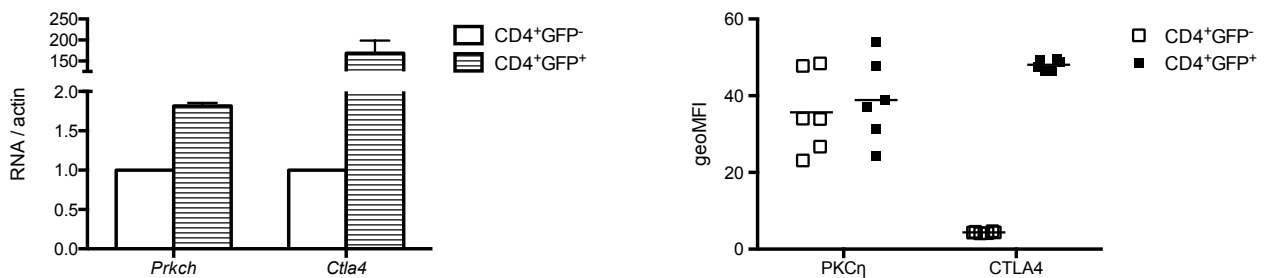

**Supplementary Fig. 1.** Lack of CTLA-4 interaction with PKC isoforms other than PKC- $\eta$ , and the expression of PKC- $\eta$  and CTLA-4 in T<sub>reg</sub> vs. T<sub>eff</sub> cells. **(a)** MCC-specific T hybridoma cells were left unstimulated (-) or stimulated (+) for 5 min with crosslinked anti-CD3 plus -CTLA-4 mAbs. Cell lysates (WCL) or CTLA-4 immunoprecipitates (2 left lanes in each panel) were resolved by SDS-PAGE, and immunoblotted with the indicated PKC-specific or anti-CTLA-4 Abs. **(b)** CD4<sup>+</sup> T cells were purified from spleens of FIG mice, and FACS-sorted into GFP<sup>+</sup> (T<sub>reg</sub>) and GFP<sup>-</sup> (T<sub>eff</sub>) cells. Equal number of sorted cells were subjected to RNA purification, reverse transcription, and quantitative PCR to determine the mRNA levels of *Prkch* and *Ctla4* (left panel). Intracellular staining of PKC- $\eta$  and CTLA-4 was performed to determine their respective protein levels (right panel).

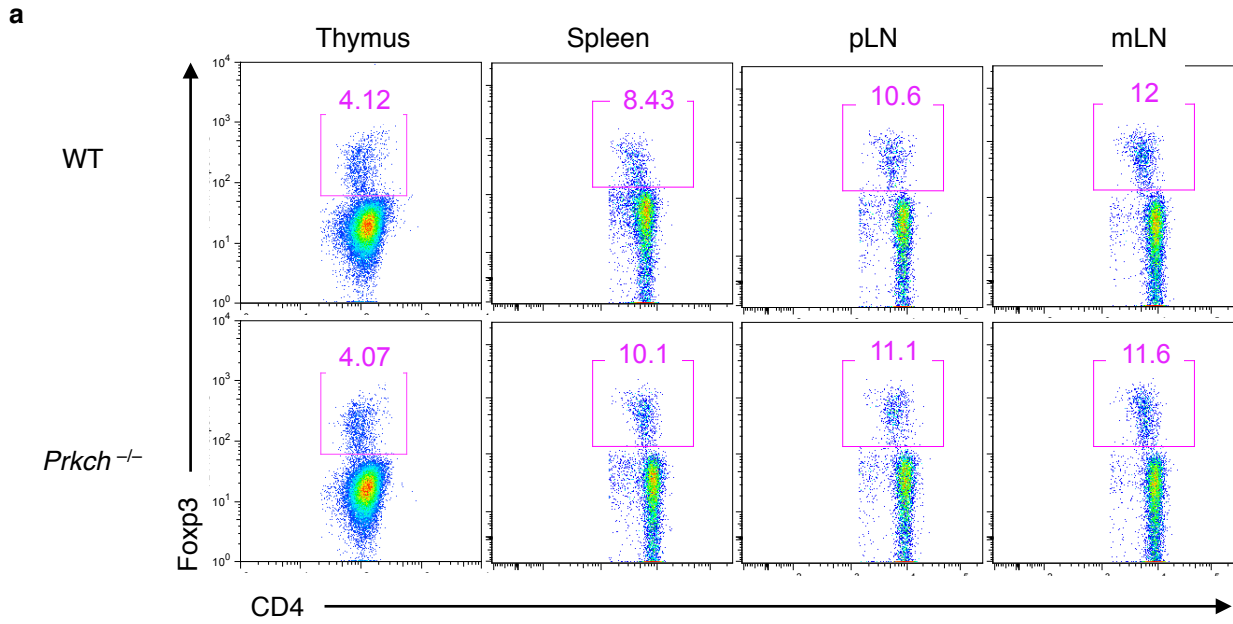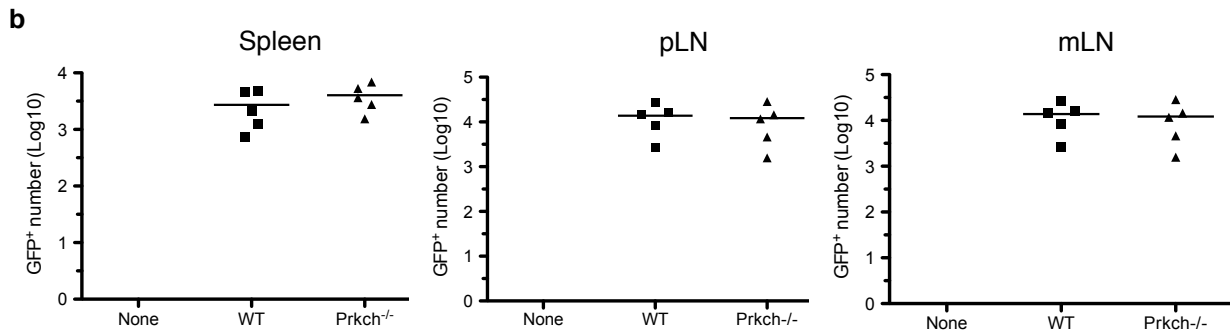

**Supplementary Fig. 2.** Frequency of  $T_{reg}$  cell populations. **(a)** The  $CD4^{+}Foxp3^{+}$  cell population from thymi, spleens, peripheral lymph nodes (pLN) and mesenteric lymph nodes (mLN) of 8- to 12-week-old mice were determined by intracellular staining of Foxp3. **(b)** Number of  $GFP^{+} T_{reg}$  cells recovered from mice undergoing homeostatic expansion (see **Fig. 3b-d**). Naïve T cells from allotypically marked  $CD45.1^{+}$  B6.SJL mice were transferred alone (None), or cotransferred with FACS-sorted  $CD4^{+}GFP^{+} T_{reg}$  cells from WT or *Prkch*<sup>-/-</sup> FIG mice into *Rag1*<sup>-/-</sup> mice. The numbers of  $GFP^{+}$  cells in spleens, pLN and mLN were determined. Each data point represents a single mouse.

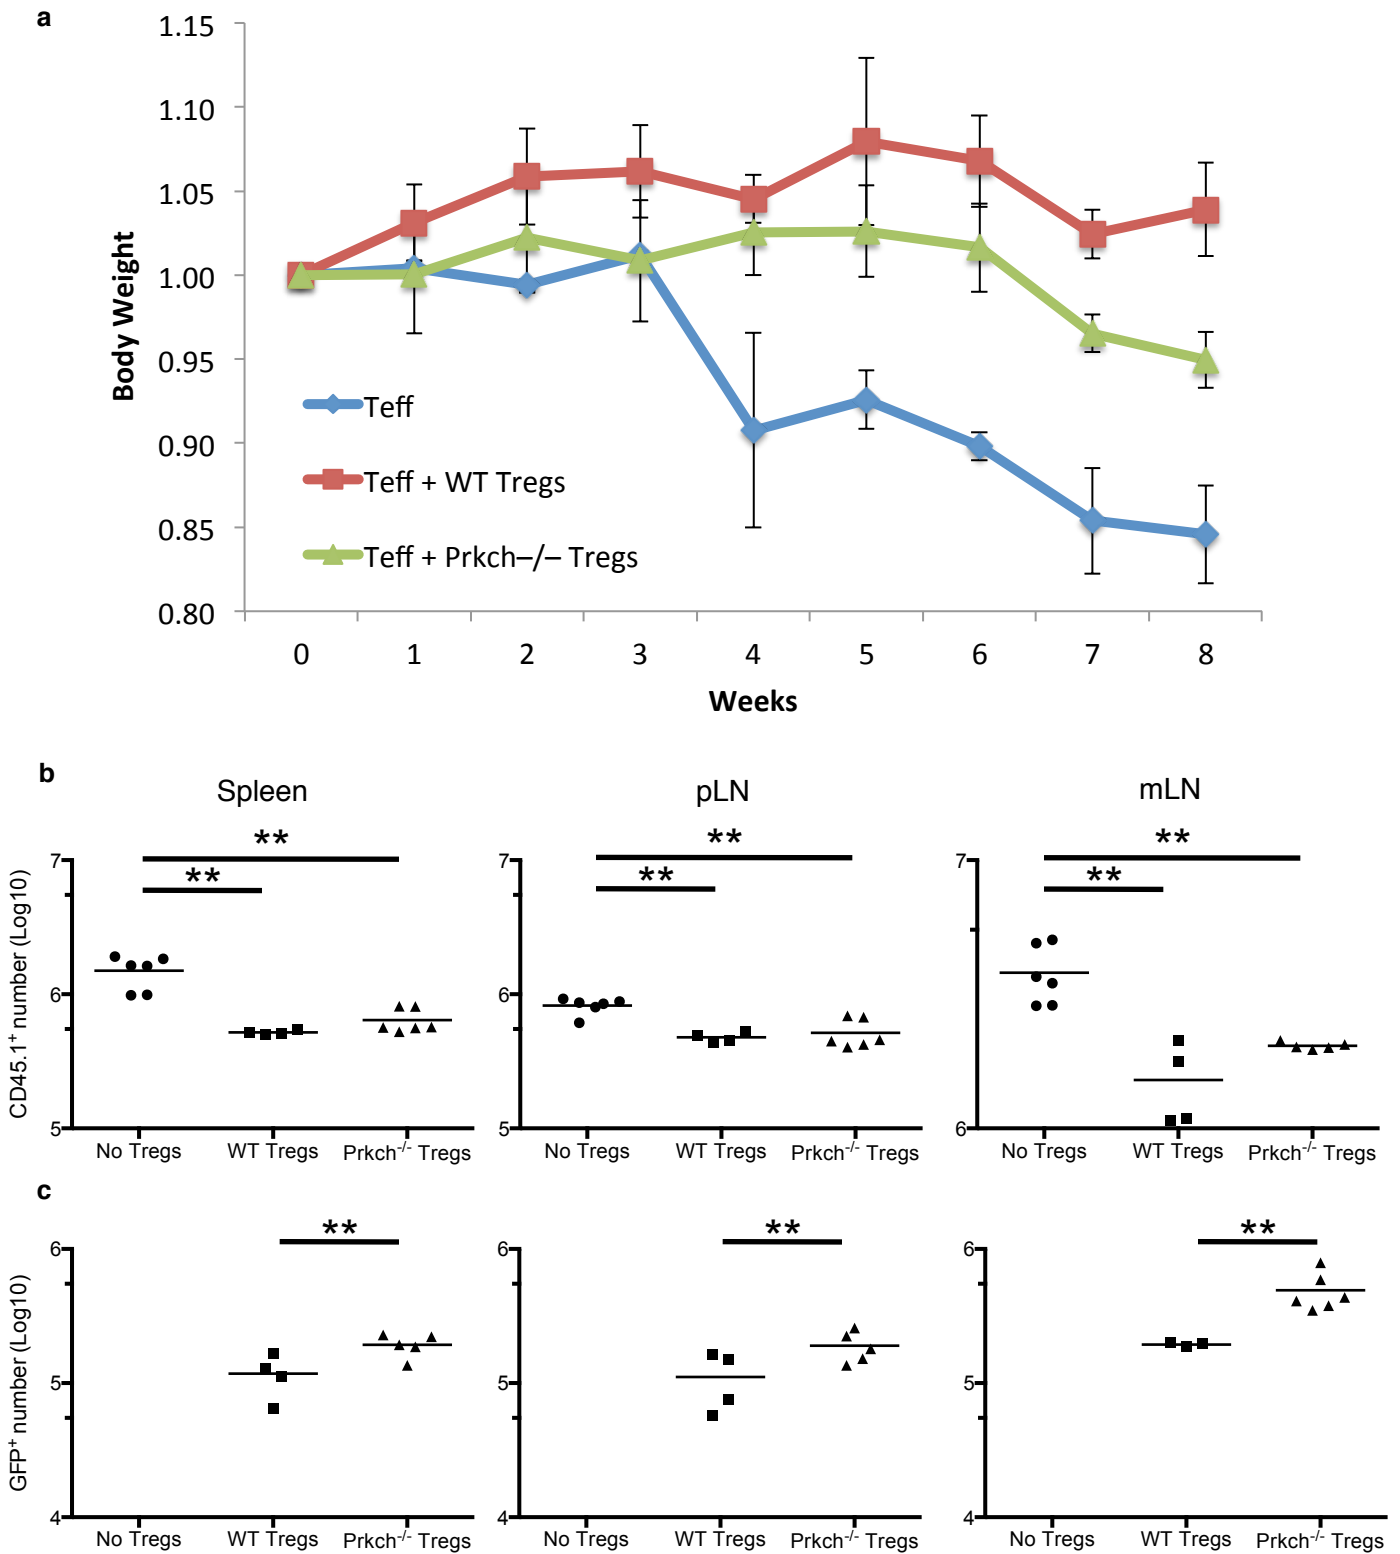

**Supplementary Fig. 3.** *Prkch*<sup>-/-</sup> T<sub>reg</sub> cells protect mice in a T cell transfer model of colitis. **(a)** Sorted CD4<sup>+</sup>CD62L<sup>+</sup> naïve T cells (T<sub>eff</sub>) in the absence or presence of WT or *Prkch*<sup>-/-</sup> GFP<sup>+</sup> T<sub>reg</sub> cells were cotransferred into *Rag1*<sup>-/-</sup> mice and weight was monitored over time as indicated. Mice were sacrificed 10 weeks post-transfer. **(b,c)** The infiltrating T cell populations in spleens, peripheral lymph nodes (pLN) and mesenteric lymph nodes (mLN) were analyzed by flow cytometry and enumerated. \*\**P* < 0.05



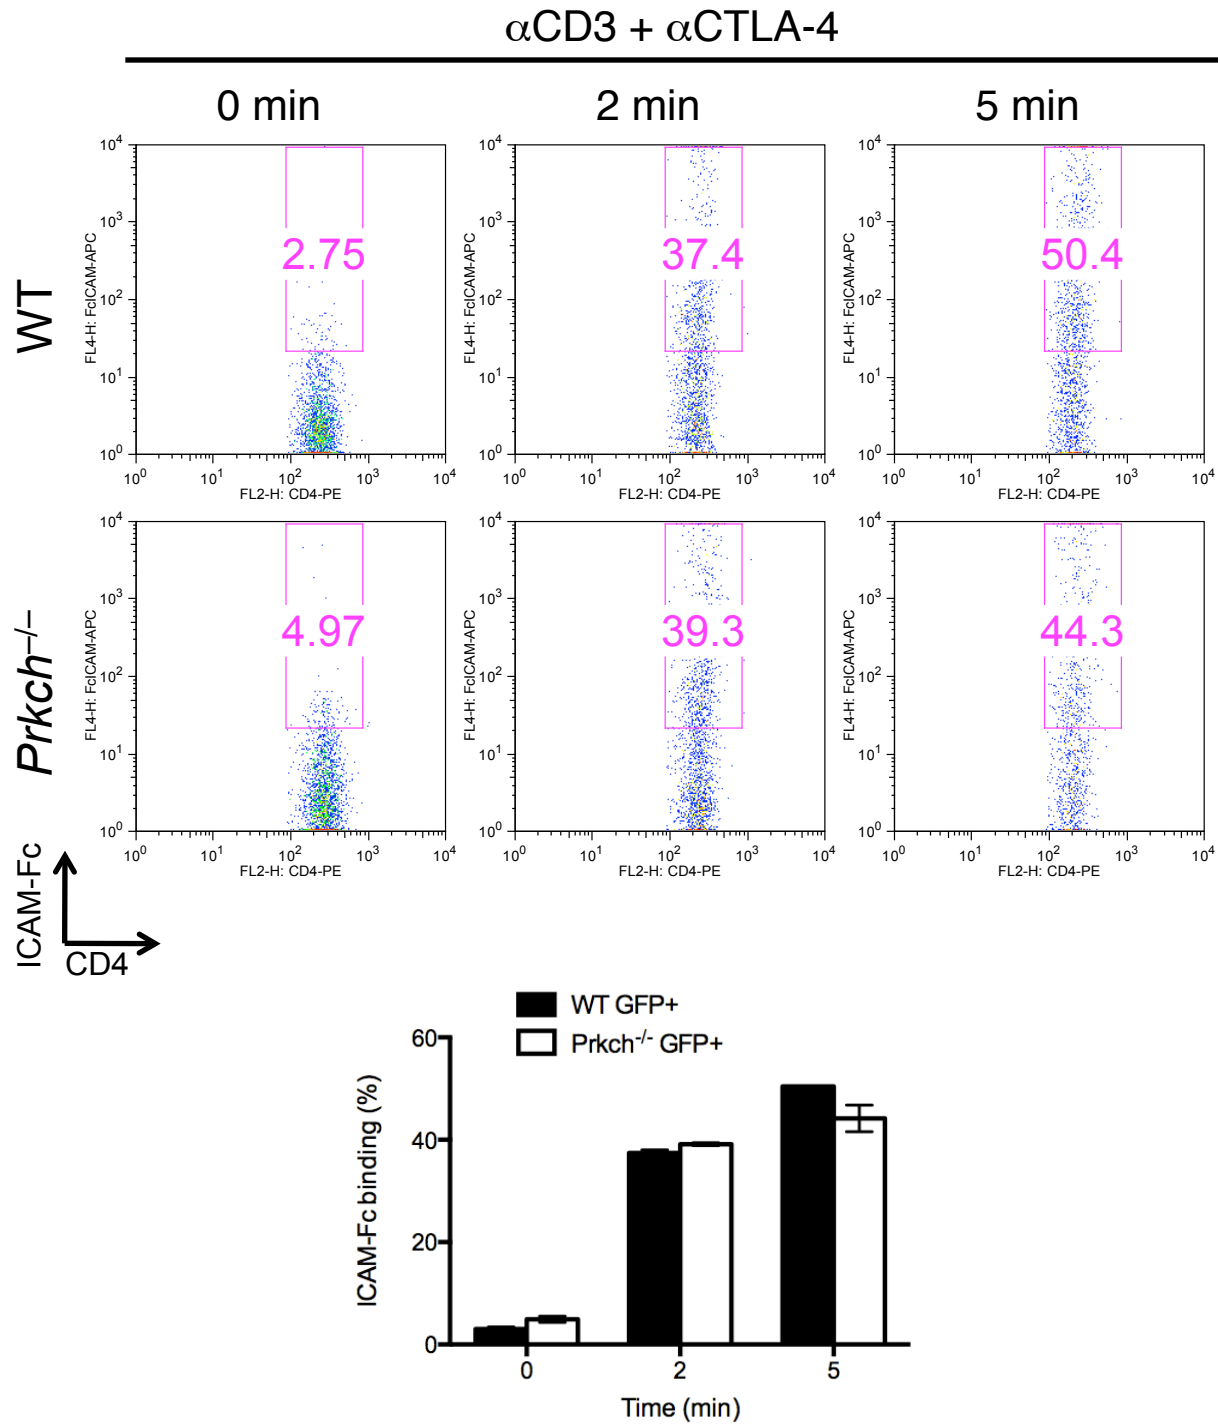

**Supplementary Fig. 5.** Effect of *Prkch* deletion on LFA-1 function. Purified CD4<sup>+</sup> cells from WT or *Prkch*<sup>-/-</sup> FIG mice were stimulated with anti-CD3 plus anti-CTLA-4 Abs for the indicated times. The function of LFA-1 was measured by its ability to bind to ICAM1-Fc. Cells were stained with fluorophore-conjugated anti-CD4 and anti-Fc antibodies. Shown are representative data gated on GFP<sup>+</sup> cells (top panel) and cumulative data of 2 independent experiments (bottom panel).

a

| Protein | Putative function   | Fold change |
|---------|---------------------|-------------|
| PAK2    | GTPase kinase       | 2.28        |
| Arfgap  | GTPase              | 2.13        |
| Mtap4   | Cytoskeleton        | 1.92        |
| Gm12250 | GTPase              | 1.91        |
| Lap3    | Prot turnover       | 1.80        |
| Git2    | GTPase              | 1.76        |
| Slc1a5  | Transporter         | 1.73        |
| Tcp1    | Chaperon            | 1.68        |
| Dock11  | GEF                 | 1.60        |
| Prkcb   | Signaling           | 1.58        |
| Ubr4    | E3 ubiquitin ligase | 1.58        |
| Fam65B  | Cytoskeleton        | 1.55        |
| Phc3    | Chromatin modifier  | 1.52        |

b

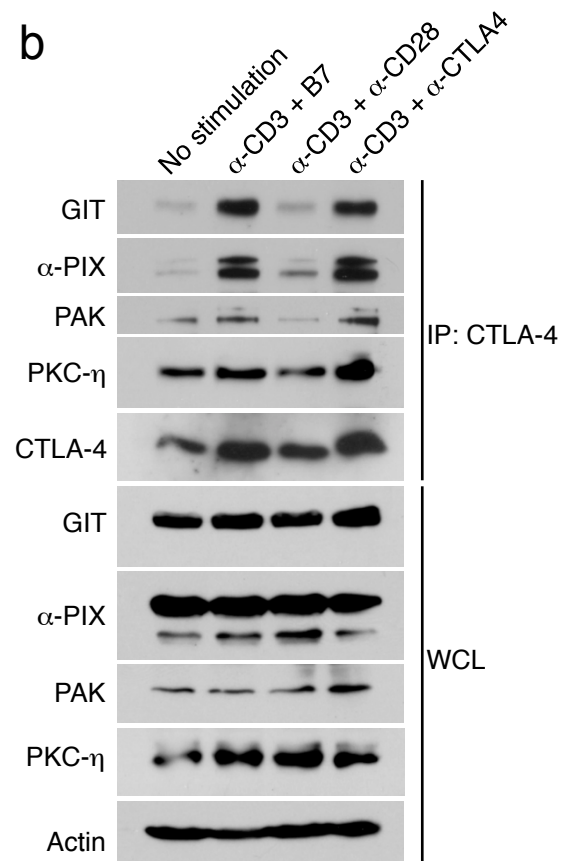

**Supplementary Fig. 6. (a)** Phosphoproteome analysis of CD3- plus CTLA-4-costimulated *in vitro*-induced  $T_{reg}$  cells. Purified  $CD4^+$  T cells from WT or *Prkch*<sup>-/-</sup> FIG mice were differentiated for 6 days into iTregs in the presence of TGF- $\beta$  and IL-2 in standard SILAC media. The cells were stimulated with anti-CD3 plus anti-CTLA-4 mAbs for 5 min before cell lysis and sample preparation for phosphoproteomic analysis. Shown are representative hypophosphorylated proteins in *Prkch*<sup>-/-</sup> Tregs as compared to WT Tregs with a fold-change of >1.5. **(b)** Recruitment of GIT-PIX-PAK complex to CTLA-4-PKC- $\eta$  complex is dependent on CTLA-4, but not CD28. MCC-specific T hybridoma cells were left unstimulated or stimulated with anti-CD3 and anti-B7, anti-CD3 and anti-CD28, or anti-CD3 and anti-CTLA-4 for 5 min prior to CTLA-4 immunoprecipitation. Immunoblotting was carried out with indicated antibodies.
